1 **Demographic variation and socioeconomic inequalities associated with the triple burden**  
2 **of malnutrition in Vietnamese children aged 6 months to 9 years old: Findings from the**  
3 **Vietnamese General Nutrition Survey 2020**

4 *P.Y. Tan<sup>1</sup>, V. S. Som<sup>1,2</sup>, S. D. Nguyen<sup>3,4</sup>, X. Tan<sup>1</sup>, D.T. Tran<sup>4</sup>, T.N. Tran<sup>5</sup>, V.K. Tran<sup>5</sup>, L. Dye<sup>16</sup>,*  
5 *J. B. Moore<sup>1</sup>, S. Caton<sup>7</sup>, H. Ensaff<sup>1</sup>, X. Lin<sup>8</sup>, G. Smith<sup>9</sup>, Y. Y. Gong<sup>1</sup>*

6 <sup>1</sup> School of Food Science and Nutrition, Faculty of Environment, University of Leeds, Leeds  
7 LS2 9JT, United Kingdom

8 <sup>2</sup> Section of International Health, Department of Health Sciences, Vrije Universiteit  
9 Amsterdam, Amsterdam, The Netherlands

10 <sup>3</sup> Division of Human Nutrition and Health, Wageningen University and Research,  
11 Wageningen, Netherlands

12 <sup>4</sup> Nutrition Surveillance and Policy Department, National Institution of Nutrition, 48B Tang  
13 Ba Ho, Hai Ba Trung District, Ha Noi, Vietnam

14 <sup>5</sup> Department of Micronutrient, National Institution of Nutrition, 48B Tang Ba Ho, Hai Ba  
15 Trung District, Ha Noi, Vietnam

16 <sup>6</sup> Institute for Sustainable Food and Department of Psychology, University of Sheffield, S1  
17 4DP, United Kingdom

18 <sup>7</sup> Sheffield Centre for Health and Related Research (SCHARR), School of Medicine and  
19 Population Health, University of Sheffield, S1 4DP, United Kingdom

20 <sup>8</sup> Global Sustainable Development, University of Warwick, Coventry, CV4 7AL, UK

21 <sup>9</sup> International Life Sciences Institute (ILSI) Southeast Asia Region, 18, Mohamed Sultan  
22 Road, #03-01, Singapore 238967

23 **Abstract**

24 Introduction: The triple burden of malnutrition (TBM) is a growing public health issue  
25 worldwide. This study examined the prevalence and association between undernutrition,  
26 overnutrition and micronutrient deficiencies (MNDs), and the associated demographic and  
27 socioeconomic determinants, among Vietnamese children, using the nationally representative  
28 General Nutrition Survey 2020.

29 Methods: Data on anthropometric parameters, micronutrients biomarkers, demographic and  
30 socioeconomic indicators for 7,289 children aged 6 months to 9 years old were analysed.  
31 Determinants of malnutrition were assessed using logistic regressions and reported as odds  
32 ratio (OR) [95% confidence intervals (CI)].

33 Results: Overall, 12.7%, 10.5% and 4.7% of children were stunted, underweight and  
34 wasted/thin; while 7.3% and 7.1% were living with overweight and obesity, respectively.  
35 Low serum zinc, anaemia and iron deficiency (ID) were the common MNDs observed,  
36 affecting 53.1%, 15.2% and 13.9% of the study participants. Older children aged 2-4 years  
37 old [OR (95% CI): 1.43 (1.20, 1.72)], ethnic minorities [5.94 (3.78, 9.36)] and living in  
38 mountainous areas [5.06 (1.18, 14.42)] had increased odds of stunting, whereas reduced odds  
39 were found in children from the richest quintile [0.13 (0.05, 0.32)]. Similar determinants were

40 found to be associated with underweight and MNDs. Males [1.43 (1.16, 1.76)], children aged  
41 5-9 years old [10.02 (6.71, 14.97) and children from the richest quintile [2.91 (1.20, 7.05)]  
42 had increased odds of overweight. Children with anaemia, low serum retinol and low serum  
43 zinc had increased odds of stunting and underweight than non-micronutrient deficient  
44 children (adjusted OR=1.43-1.71). Compared to children without MNDs, those with  $\geq 3$   
45 MNDs had almost double the odds of stunting and underweight, whereas those with  $\leq 3$   
46 MNDs had reduced odds of overweight (adjusted OR=0.38-0.60).

47 Conclusions: Significant demographic variation and socioeconomic inequalities in child  
48 malnutrition were identified. National policies and programmes in Vietnam should address  
49 age-specific, sex-specific, geographical and socioeconomic disparities to accelerate progress  
50 in reducing child malnutrition.

51 **Words:** 5,573

52 **What is already known on this topic?** *summarise the state of scientific knowledge on this*  
53 *subject before you did your study and why this study needed to be done*

- 54 • The triple burden of malnutrition (TBM) refers to the co-existence of undernutrition,  
55 overnutrition and micronutrient deficiencies (MNDs). Although TBM is a major  
56 public health issue that affects every country in the world, it is particularly pervasive  
57 in low- and middle-income countries.
- 58 • There is no recent data investigating the magnitude of the TBM in Vietnam and how  
59 prevalence of TBM differs across different demographic and socioeconomic groups,  
60 especially amongst infants and young children.

61 **What this study adds?** *summarise what we now know as a result of this study that we did*  
62 *not know before*

- 63 • Our analysis of the Vietnamese national representative General Nutrition Survey  
64 (GNS) 2020 data demonstrated the extent of the co-existence of each aspect of the  
65 TBM among children in Vietnam, and demographic variation and socioeconomic  
66 inequalities in child malnutrition were identified.
- 67 • Although child stunting reduction is on track towards the target of 40% reduction by  
68 2025 set by the Global Nutrition Targets, prevalence is still high at 10%-15% in 2020.  
69 Meanwhile overweight and obesity in school aged children is off track the target with  
70 the prevalence in urban areas increasing from 8.5% in 2010 to 31% in 2020.
- 71 • Stunting, underweight and MNDs were more prevalent in infants and young children,  
72 particularly in ethnic minorities, living in the rural and mountainous areas and poorer  
73 families. Childhood overweight and obesity were evident, especially among school-  
74 aged children, males, living in the urban areas and richer families.
- 75 • Low serum zinc (53%), anaemia (15%) and iron deficiency (14%) were the most  
76 common MNDs, and prevalence of low serum retinol was relatively low (<7%) in this  
77 population.

78 **How this study might affect research, practice or policy?** *summarise the implications of*  
79 *this study*

- 80 • These findings emphasise the need for double-duty actions to simultaneously address  
81 all forms of child malnutrition in Vietnam.
- 82 • National food and nutrition policies and programmes in Vietnam should address age-  
83 specific, sex-specific, geographical and socioeconomic disparities to ensure equitable  
84 access and opportunities for all, to accelerate progress in reducing child malnutrition.

## 85 **Introduction**

86 Malnutrition in all forms, including undernutrition, overnutrition and micronutrient  
87 deficiencies (MNDs) currently affects every country in the world to a greater or lesser degree.  
88 Child malnutrition exerts significant impacts on a country's economy as it reduces human  
89 productivity and creates a burden on the health care system (1). Undernutrition is known to  
90 increase the risk of child mortality and morbidity in children under five, and the associated  
91 MNDs such as iron, zinc, folate, iodine and vitamin A increase susceptibility to infections,  
92 impair immune function and reduce growth and development (2). Children living with  
93 overweight and obesity are more likely to become adults with obesity and an elevated risk of  
94 obesity-related non-communicable diseases (NCDs) at a younger age (3, 4). Moreover, life  
95 course evidence shows that exposure to early undernutrition is linked to overweight and  
96 obesity that later in life will increase the risk of NCDs (5). Thus, childhood is a critical period  
97 to address nutrition-related disease burden and prevent intergenerational malnutrition and its  
98 consequences.

99 Vietnam has committed to achieving the targets set in the UN Sustainable  
100 Development Goals (SDGs) (6). In particular, SDG 2.2 calls for an end to all forms of  
101 malnutrition. By 2030, the Vietnamese government aims to reduce child stunting and  
102 underweight in children aged <5 years old to <20% and <10%, respectively, and to reduce  
103 the prevalence of overweight in urban areas to <10% (6). The General Nutrition Survey  
104 (GNS) reported that the prevalence of stunting in Vietnamese children aged under five has  
105 been substantially reduced from 43.3% in 2000 to 29.3% in 2010 and to 24.5% in 2015. The  
106 prevalence of underweight has also reduced from 30.1% in 2000 to 17.5% in 2010 and 13.9%  
107 in 2015 (6-8). However, the reduction in undernutrition has been slower in the rural areas of  
108 the Northern, the South-Central and the Central Highlands regions. In contrast, in urban  
109 regions, there has been an increasing trend in childhood obesity. Whereby the prevalence of  
110 overweight and obesity among children and adolescents aged 5–19 years has risen from 8.5%  
111 in 2010 to 19.0% in 2020, and is higher in urban and rural areas than in mountainous areas  
112 (26.8% and 18.3% vs. 6.9%) (9). This regional disparity in undernutrition and overnutrition  
113 which is related to the inequalities in socioeconomic growth and development between  
114 regions, poses significant challenges for Vietnam to achieve their national goals in ending all  
115 forms of malnutrition in the near term (10).

116 MNDs negatively affect human health over the life course, but have been under-  
117 recognised (11). This “hidden hunger” is increasingly evident in individuals with both  
118 undernutrition and overnutrition (12). Using pooled analyses from nationally representative  
119 population-based surveys spanning 2003-2019, Stevens and colleagues (2022) reported that  
120 nearly 56% (~372 million) of children aged 6-59 months globally were suffering from at least  
121 one of the three common MNDs (iron, zinc and vitamin A) (13). In Vietnam, MNDs have  
122 been reported to affect nearly 66% of children aged <5 years old, with 56%, 19%, 6% and 14%  
123 experiencing iron, zinc, vitamin A and vitamin D deficiencies, respectively (13). Both food  
124 insecurity (e.g., energy and nutrient inadequate diets) and micronutrient-poor, energy-dense  
125 diets are strongly associated with MNDs (14, 15). This co-occurrence has prompted the term  
126 “triple burden of malnutrition” (16).

127 To date, there are limited recent data on the prevalence and associations between  
128 multiple burdens of malnutrition, and relevant demographic and socioeconomic factors in  
129 Vietnam, especially among children. Therefore, this study aimed to determine the prevalence  
130 of undernutrition (stunting, underweight and wasting/thinness), overnutrition (overweight  
131 and obesity) and MNDs (anaemia, iron, vitamin A or retinol and zinc deficiencies), in  
132 Vietnamese children aged 6 months to 9 years old, to explore its associations with  
133 demographic and socioeconomic indicators, and to examine the relationship between MNDs  
134 and undernutrition, and overnutrition, using data from the nationally representative  
135 Vietnamese GNS 2020.

## 136 **Methods**

### 137 **Study population and study design**

138 Secondary analysis of the nationally representative Vietnamese GNS 2020 was performed.  
139 The GNS is conducted every 10 years by the National Institute of Nutrition (NIN). A  
140 multi-stage cluster sampling technique was used to select a representative sample of  
141 Vietnamese population. Clusters corresponded to census enumeration areas (EAs) and were  
142 treated as primary sampling units. The first stage of sampling involved selection of a sub-set  
143 of provinces across six geographical areas in Vietnam, namely i) Northern midlands and  
144 mountainous areas, ii) Central highlands, iii) Red River Delta (including Hanoi Capital); iv)  
145 North-central and central coastal areas, v) Southeast and vi) Mekong River Delta (including  
146 Ho Chi Minh City). EAs were selected from 25 out of 63 provinces to represent the six  
147 geographical areas. In the second stage of sampling, the EAs from the selected provinces

148 were allocated to an urban, rural and mountainous stratum to ensure representation of  
149 urbanicity. In the final stage of sampling, eligible individuals from each EAs were randomly  
150 selected for enrolment in GNS 2020. Participants encompassed various sub-groups, including  
151 those aged 0-5, 6-9, 10-14, and 15-49 years old, along with pregnant and lactating women.  
152 For children aged  $\leq 9$  years old, informed written consent was obtained from their  
153 parents/caregivers. Individuals who declined to respond or did not provide written informed  
154 consent were included from the survey. A total of 20,864 individuals were enrolled in GNS  
155 2020. In this study, individuals were excluded if they had missing age data or if they aged  $< 6$   
156 months and  $> 9$  years old. Finally, a total of 7,829 children aged 6 months to 9 years old who  
157 had complete demographic indicators were included for analysis.

### 158 **Anthropometric measurements**

159 All anthropometric measurements including body weight and height/length were taken in  
160 children wearing light clothes and without shoes. All measurements were taken twice, and the  
161 mean was calculated. The anthropometric status of the children was classified according to  
162 the WHO Child Growth Standards for children aged  $< 5$  years old (17), and WHO Growth  
163 Reference for children aged 5-9 years old (18), depending upon the child's age. Stunting was  
164 defined as height-for-age z-scores (HAZ)  $< -2$  standard deviation (SD). Underweight was  
165 defined as weight-for-age z-scores (WAZ)  $< -2$  SD. For children aged  $< 5$  years old, wasting  
166 was defined as weight-for-height z-scores (WHZ)  $< -2$  SD, whereas for children aged 5-9  
167 years old, thinness was defined as body mass index (BMI)-for-age z-scores (BAZ)  $< -2$  SD.  
168 BMI was defined as weight (kg) divided by the square of height (m). Overweight and obesity  
169 were defined as weight-for-height z-scores (WHZ)  $> +2$  SD to  $\leq +3$  SD and  $> +3$  SD for  
170 children aged  $< 5$  years old (17), and BMI-for-age z-scores (BAZ)  $> +1$  SD to  $\leq +2$  SD and  $>$   
171  $+2$  SD for children aged 5-9 years old (18), respectively. Children with HAZ and WHZ  $< -6$   
172 SD and  $> +6$  SD or children with WAZ  $< -6$  SD or  $> +5$  SD compared to the WHO median  
173 value were flagged as outliers and were removed as per WHO recommendation (17, 18).

### 174 **Biochemical analysis**

175 Blood samples of children aged 6 months to 9 years old were drawn by venepuncture  
176 by experienced nurses following rigorous blood collection, storage and analysis SOPs  
177 determined by National Institute of Nutrition (NIN) Vietnam. A total of 5 mL non-fasting  
178 blood was collected from each participant. Haemoglobin (Hb) was measured for each  
179 participant immediately after blood sample collection using a HemoCue® Hb 301 analyser

180 (HemoCue Angholm, Sweden). The Hb value was recorded and provided to the participant's  
181 parent or caregiver. Any participant who had severe anaemia (<7.0 g/L for children) was  
182 referred to the physician at the Commune Health Center. Blood samples were stored in the  
183 dark in a cool box. The bloods from both vacutainers were centrifuged (3000 g, 10 minutes)  
184 using portable centrifuges, serum/plasma was aliquoted and subsequently frozen at -20°C  
185 until transport (on dry ice) to the laboratory at NIN where they were stored at -80 °C until  
186 analysis.

187 Samples were analysed at VitMin Lab (Germany) for serum ferritin, transferrin  
188 receptor (sTfR), C-reactive protein (CRP),  $\alpha$ -1-acid glycoprotein (AGP) and retinol binding  
189 protein (RBP) and at NIN laboratory for serum retinol and zinc. Serum ferritin, TfR, RBP,  
190 CRP and AGP concentrations were measured by VitMin Lab ELISA assays at VitMin Lab  
191 (Germany). Accuracy was tested by controls from CDC, USA and National Institute of  
192 Biological Standards and Control. Serum retinol concentration was determined by reverse-  
193 phase liquid chromatography with tandem mass spectrometry (Sciex Qtrap 6500+) with  
194 quality controls approved by CDC, US. Serum zinc concentration was analysed by a flame  
195 atomic absorption spectrophotometer (GBC, Avanta+) using trace element-free procedures,  
196 and powder free gloves (Latex Glove), and results were verified using reference materials  
197 (Liquicheck, Bio-Rad Laboratories, USA). The within-assay CV for serum ferritin, zinc,  
198 retinol, CRP and AGP ranged from 2.9 to 7.1 %, and between-assay variability was <10 % for  
199 all the biomarkers.

## 200 **Micronutrient deficiencies**

201 Anaemia was defined as Hb concentrations <11.0 g/dL and <11.5 g/dL for children  
202 aged <5 and 5-9 years old, respectively (19). Different cut offs were applied to define iron  
203 deficiency (ID) in children of different age and inflammatory status. ID was defined as serum  
204 ferritin concentrations <12  $\mu$ g/L (<5 years old) and <15  $\mu$ g/L (5-9 years old) in children  
205 without inflammation. Whereas, cut offs of <30  $\mu$ g/L (<5 years old) and <70  $\mu$ g/L (5-9 years  
206 old) were applied for children with inflammation. Inflammation was defined as CRP >5 mg/L  
207 and/or AGP >1 g/L (20). Iron deficiency anaemia (IDA) was defined as the presence of both  
208 anaemia and ID. Low serum retinol was defined as serum retinol concentrations <0.70  
209  $\mu$ mol/L (21). Low serum zinc was defined as serum zinc concentration <9.9  $\mu$ mol/L (morning,  
210 non-fasting) or <8.7  $\mu$ mol/L (afternoon, non-fasting) according to International Zinc

211 Nutrition Consultative Group (22). Total number of MNDs included anaemia, ID, low serum  
212 retinol and low serum zinc.

### 213 **Demographic and socioeconomic indicators**

214 A structured questionnaire was used to collect demographic and socioeconomic data from the  
215 parents/caregivers including child's age, sex, ethnicity (Kinh and other ethnicities),  
216 geographical areas (Northern mountains, Red River Delta, North Central and Central Coast,  
217 Central Highlands, Southeast, Mekong Delta River) and area of residence (urban, rural, and  
218 mountainous). Household wealth index was determined according to the Demographic and  
219 Health Survey (DHS) Wealth Index (23). It was computed based on household ownership of  
220 selected assets, materials used for housing construction, types of water access and sanitation  
221 facilities by the statisticians from NIN. The household wealth index was grouped into  
222 quintiles for further analysis: poorest (Q1), poorer (Q2), middle (Q3), richer (Q4) and richest  
223 (Q5) quintiles. The household wealth index was used as a proxy indicator for children's  
224 socioeconomic status.

### 225 **Statistical analysis**

226 All statistical analyses were conducted using STATA (version 18; Stata Corp LLC, Cary, NC,  
227 USA). All analyses were weighted and accounted for complex survey design using svyset  
228 commands to adjust for individual sampling weight, clustering and stratification. Baseline  
229 characteristics by area of residence were reported as mean  $\pm$  SD for continuous variables and  
230 number (percentage) for categorical variables; they were compared using one-way between  
231 groups ANOVA with Bonferroni post hoc tests and Chi Squared test of association,  
232 respectively. Univariate logistic regressions were performed to determine the associations  
233 between demographic and socioeconomic factors and all forms of malnutrition. Both  
234 univariate and multivariate logistic regressions were performed to assess the associations  
235 between under- and over-nutrition and MNDs. Demographic and socioeconomic factors  
236 showed significant association in the univariate logistic regression analyses were included in  
237 the multivariate logistic regression analyses for adjustment. The covariates included age, sex,  
238 area of residence, wealth index and inflammation. Ethnicity and geographical area were not  
239 included due to multicollinearity. The crude odds ratio (OR) or adjusted OR (AOR) and  
240 respective 95% confidence intervals (CI) were reported. P value  $<0.05$  was considered  
241 statistically significant.

### 242 **Result**



243 General characteristics, anthropometric parameters, and micronutrients biomarkers of the  
 244 study participants from rural, urban and mountainous areas are reported in **Table 1**. See **Table**  
 245 **S1** for the number of participants with missing data for each variable. The average age  $\pm$  SD  
 246 of the study participants was  $5 \pm 3$  years old and 48.5% were females. Nearly half of the  
 247 children (52.4%) were aged 5-9 years old, whereas 31.6% and 16.0% of them were aged 2-4  
 248 and <2 years old, respectively. A significantly larger proportion of the children in urban areas  
 249 were from the richest quintile (Q5) compared to those from the mountainous areas (17.3% vs.  
 250 1.6%;  $p=0.005$ ), and these children came mainly from the Kinh major ethnic group (93.5%  
 251 vs. 36.3%;  $p<0.001$ ). All anthropometric parameters except for HAZ were significantly  
 252 higher in children from urban areas, compared to rural or/and mountainous areas ( $p<0.05$ ).  
 253 With respect to micronutrients biomarkers, concentrations of serum zinc were significantly  
 254 higher, whereas serum transferrin receptor were significantly lower in children from urban  
 255 areas ( $p<0.05$ ). See **Table S2** for the mean (SD) age, anthropometric and biomarkers of  
 256 micronutrients of the Vietnamese children by nutritional status.

257 **Table 1: General characteristics, anthropometric parameters and micronutrients biomarkers of**  
 258 **the Vietnamese children in this study, and by area of residence (n=7,829)**

| Variables                            | Total<br>(n=7,829) | Urban<br>(n=2,540) | Rural<br>(n=3,840) | Mountainous<br>(n=1,449) | p-value |
|--------------------------------------|--------------------|--------------------|--------------------|--------------------------|---------|
| Age (years)                          | $5 \pm 3$          | $5 \pm 3$          | $5 \pm 3$          | $5 \pm 3$                | 0.330   |
| Age group                            |                    |                    |                    |                          | 0.405   |
| <2 years old                         | 2039 (16.0)        | 634 (14.6)         | 1016 (16.8)        | 389 (15.7)               |         |
| 2-4 years old                        | 3513 (31.6)        | 1056 (31.1)        | 1766 (31.8)        | 3513 (31.6)              |         |
| 5-9 years old                        | 2277 (52.4)        | 850 (54.3)         | 1058 (51.4)        | 2277 (52.4)              |         |
| Sex                                  |                    |                    |                    |                          | 0.433   |
| Males                                | 3958 (51.5)        | 1277 (48.6)        | 1895 (49.2)        | 699 (46.1)               |         |
| Females                              | 3871 (48.5)        | 1263 (51.4)        | 1945 (50.8)        | 750 (53.9)               |         |
| Geographical area                    |                    |                    |                    |                          | <0.001  |
| Northern mountains                   | 1207 (15.5)        | 129 (4.1)          | 0                  | 1078 (86.1)              |         |
| Red River Delta                      | 1395 (26.6)        | 490 (33.8)         | 905 (30.8)         | 0                        |         |
| North Central and<br>Central Coastal | 1466 (22.4)        | 398 (18.1)         | 1068 (31.8)        | 0                        |         |
| Central Highlands                    | 1157 (6.1)         | 786 (12.5)         | 0                  | 371 (13.9)               |         |
| Southeast                            | 1218 (15.2)        | 460 (21.7)         | 758 (16.2)         | 0                        |         |
| Mekong River Delta                   | 1386 (14.3)        | 277 (9.8)          | 1109 (21.2)        | 0                        |         |
| Ethnicity                            |                    |                    |                    |                          | <0.001  |
| Kinh                                 | 6419 (85.0)        | 2189 (93.5)        | 3705 (95.4)        | 525 (36.3)               |         |
| Others                               | 1410 (15.0)        | 351 (6.5)          | 135 (4.6)          | 924 (63.7)               |         |
| Wealth index quintiles               |                    |                    |                    |                          | 0.005   |
| Poorest (Q1)                         | 1074 (13.6)        | 210 (5.5)          | 288 (8.2)          | 576 (45.6)               |         |
| Poorer (Q2)                          | 1735 (16.3)        | 564 (12.9)         | 837 (17.5)         | 344 (18.6)               |         |
| Middle (Q3)                          | 2029 (22.6)        | 727 (21.9)         | 1107 (27.0)        | 195 (9.4)                |         |
| Richer (Q4)                          | 1981 (30.2)        | 390 (22.2)         | 1268 (36.4)        | 323 (24.7)               |         |
| Richest (Q5)                         | 1010 (17.3)        | 649 (37.4)         | 340 (10.8)         | 21 (1.6)                 |         |
| <b>Anthropometric<br/>parameters</b> |                    |                    |                    |                          |         |
| Weight (kg)                          | $19.0 \pm 12.5$    | $19.9 \pm 11.1a$   | $18.9 \pm 9.1$     | $17.3 \pm 21.6b$         | 0.004   |

|                                       |              |               |               |               |        |
|---------------------------------------|--------------|---------------|---------------|---------------|--------|
| Height (cm)                           | 105.5 ± 20.1 | 106.9 ± 20.9a | 105.7 ± 16.4a | 102.0 ± 19.2b | 0.005  |
| Height-for-age z-score (HAZ)          | -0.65 ± 1.28 | -0.37 ± 1.27a | -0.60 ± 1.22b | -1.32 ± 1.29c | <0.001 |
| Weight-for-age z-score (WAZ)          | -0.40 ± 1.42 | -0.14 ± 1.44a | -0.35 ± 1.40a | -1.04 ± 1.24b | 0.001  |
| Weight-for-height z-score (WHZ)       | -0.08 ± 1.14 | -0.06 ± 1.17  | -0.06 ± 1.13  | -0.22 ± 1.06  | 0.125  |
| Body mass index-for-age z-score (BAZ) | 0.01 ± 1.34  | 0.13 ± 1.41a  | 0.02 ± 1.34   | -0.25 ± 1.11b | 0.016  |
| Body mass index units                 | 16.3 ± 4.0   | 16.8 ± 5.8a   | 16.2 ± 2.9    | 15.3 ± 3.5b   | 0.007  |
| <b>Blood biomarkers</b>               |              |               |               |               |        |
| Haemoglobin (g/dL)                    | 12.3 ± 1.2   | 12.3 ± 1.2    | 12.3 ± 1.1    | 12.0 ± 1.3    | 0.050  |
| Serum ferritin (µg/L)                 | 39.7 ± 1.3   | 38.9 ± 0.9    | 39.7 ± 1.8    | 40.7 ± 3.2    | 0.785  |
| Serum transferrin receptor (mg/L)     | 6.2 ± 2.6    | 6.0 ± 2.4a    | 6.1 ± 2.3a    | 6.7 ± 3.3b    | 0.009  |
| Body iron store                       | 5.5 ± 3.9    | 5.4 ± 3.8     | 5.5 ± 3.7     | 5.3 ± 4.5     | 0.821  |
| Serum zinc (µmol/L)                   | 9.9 ± 6.3    | 10.7 ± 6.8a   | 10.0 ± 6.4a   | 8.0 ± 4.1b    | 0.003  |
| Serum retinol (µmol/L)                | 1.2 ± 0.4    | 1.1 ± 0.4     | 1.1 ± 0.3     | 1.0 ± 0.3     | 0.089  |
| Retinol-binding protein (µmol/L)      | 1.1 ± 0.4    | 1.1 ± 0.4     | 1.1 ± 0.4     | 1.0 ± 0.4     | 0.490  |
| C-reactive protein (mg/L)             | 1.6 ± 4.5    | 1.8 ± 4.9     | 1.5 ± 4.0     | 1.6 ± 5.0     | 0.375  |
| α-1-acid glycoprotein (mg/L)          | 0.8 ± 0.3    | 0.7 ± 0.3     | 0.7 ± 0.3     | 0.8 ± 0.3     | 0.591  |

259 Continuous and categorical variables presented as mean ± SD and number (percentage), respectively.  
 260 Serum ferritin concentration (µg/L) presented as geometric mean and standard error (SE) due to non-normal  
 261 distribution.  
 262 Differences in categorical and continuous variables between area of residence were performed using Chi  
 263 Squared test of association and one-way between groups ANOVA with Bonferroni post hoc tests. p<0.05 was  
 264 considered as significantly different.  
 265 <sup>a,b,c</sup> Continuous variables with values not sharing a common lowercase letter are significantly different at p<0.05.

## 266 **Prevalence of undernutrition, overnutrition and MNDs by area of residence and age** 267 **group**

268 Overall, 12.7%, 10.5% and 4.7% of the children were either stunted, underweight or  
 269 wasted/thin; while 7.3% and 7.1% were found overweight and obese, respectively. Low  
 270 serum zinc was the most common MND investigated, affecting more than half (53.1%) of the  
 271 Vietnamese children. Prevalence of ID, anaemia, IDA, and low serum retinol was 15.2%,  
 272 13.9, 5.8%, and 6.7% respectively. 16.2% of the children had high inflammatory status  
 273 defined by CRP or/and AGP. When combining all four MNDs (anaemia, ID, low serum  
 274 retinol and low serum zinc), 58.5% of the children had at least one of four MNDs (34.2% had  
 275 one, 16.9% had two, 5.8% had three, and 1.6% had four MNDs). Prevalence of different  
 276 forms of malnutrition by area of residence and age group are illustrated in **Figure 1**. Child  
 277 stunting, underweight and wasting were more prevalent in mountainous areas compared to  
 278 rural and urban areas. Prevalence of stunting was higher in children aged 2-4 years old (15%  
 279 vs. 10.9%, and 11.0% in children aged <2 and 5-9 years old, respectively), particularly those  
 280 from the mountainous areas (34.1%). Underweight and wasting were more prevalent among

281 older children aged 5-9 years old (12.7% and 6.3%, respectively). Overweight and obesity  
282 were more common among older children aged 5-9 years old (23.0%) compared to those  
283 aged <2 (3.0%) and 2-4 (5.3%) years old, and was particularly evident in children aged 5-9  
284 years old from the urban areas (31.4%).

285 Anaemia, ID, IDA, and low serum retinol were more prevalent among younger  
286 children aged <2 years old than in older children aged 2-4 and 5-9 years old, particularly if  
287 they were from the mountainous areas as opposed to the urban areas. Over two fifths of the  
288 children aged <2 years old from the mountainous areas were affected by anaemia (vs. 16.0%  
289 and 19.7% in children aged 2-4 and 5-9 years old), and ID (vs. 12.2% and 7.4% in children  
290 aged 2-4 and 5-9 years old), and about one third were affected by low serum retinol (vs. 22.7%  
291 and 14.7% in children aged 2-4 and 5-9 years old). Whereas higher prevalence of low serum  
292 zinc was observed in older children aged 5-9 years old, especially in children from the  
293 mountainous areas (74.3%) compared to the rural (48.3%) and urban (45.6%) areas.

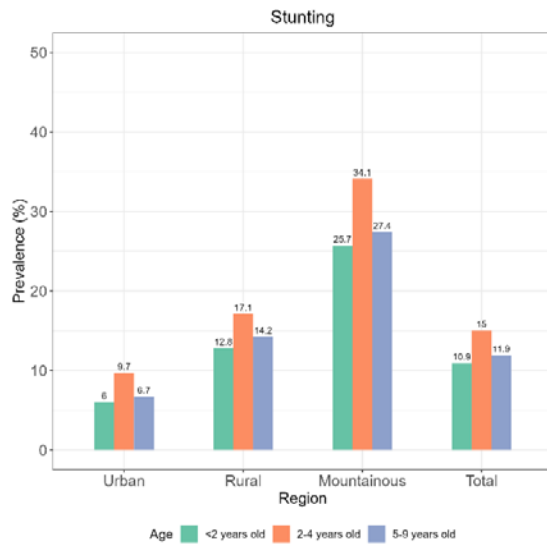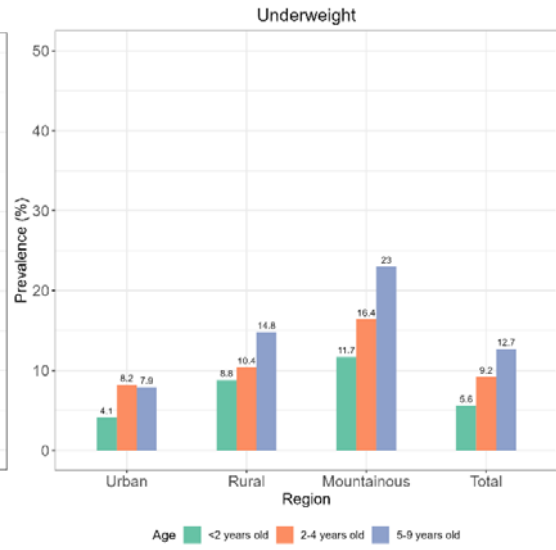

294

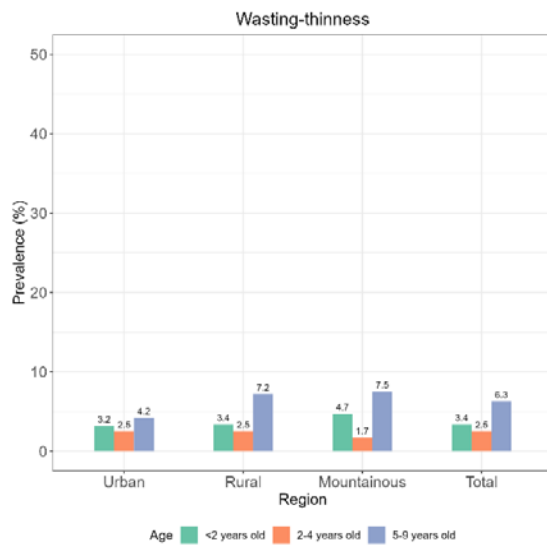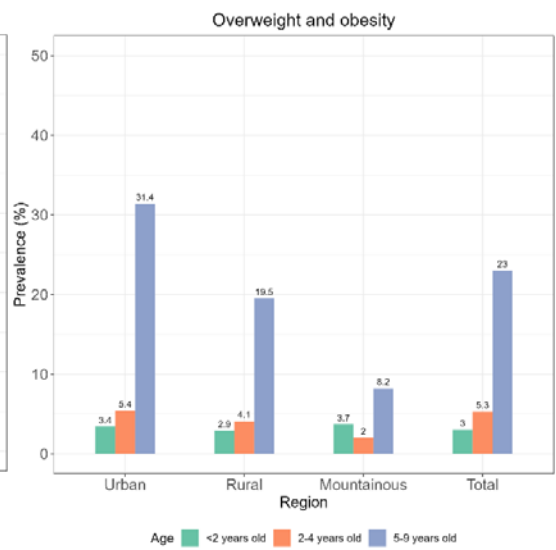

295

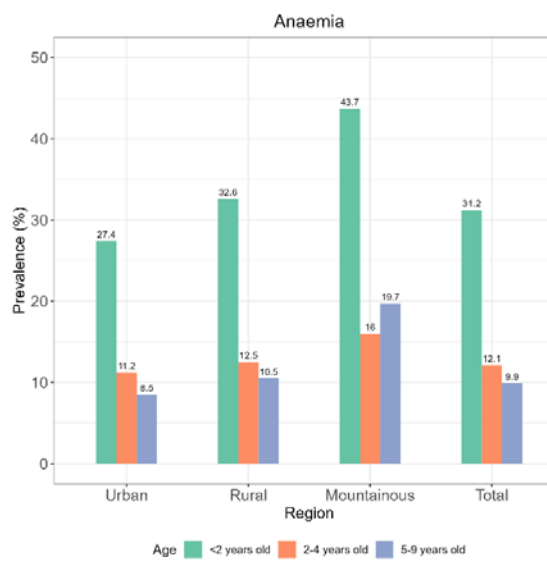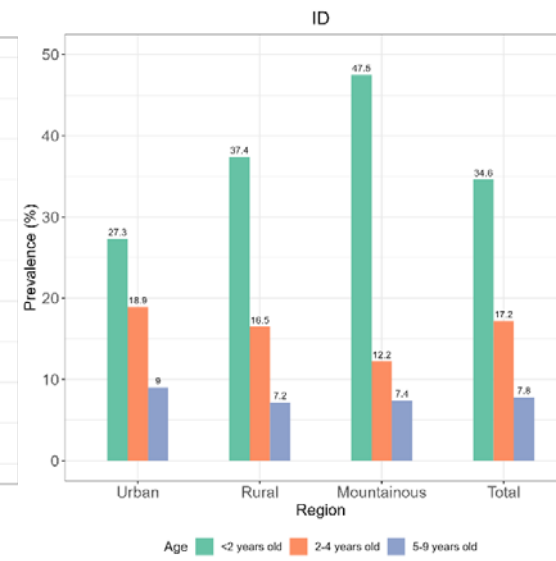

296

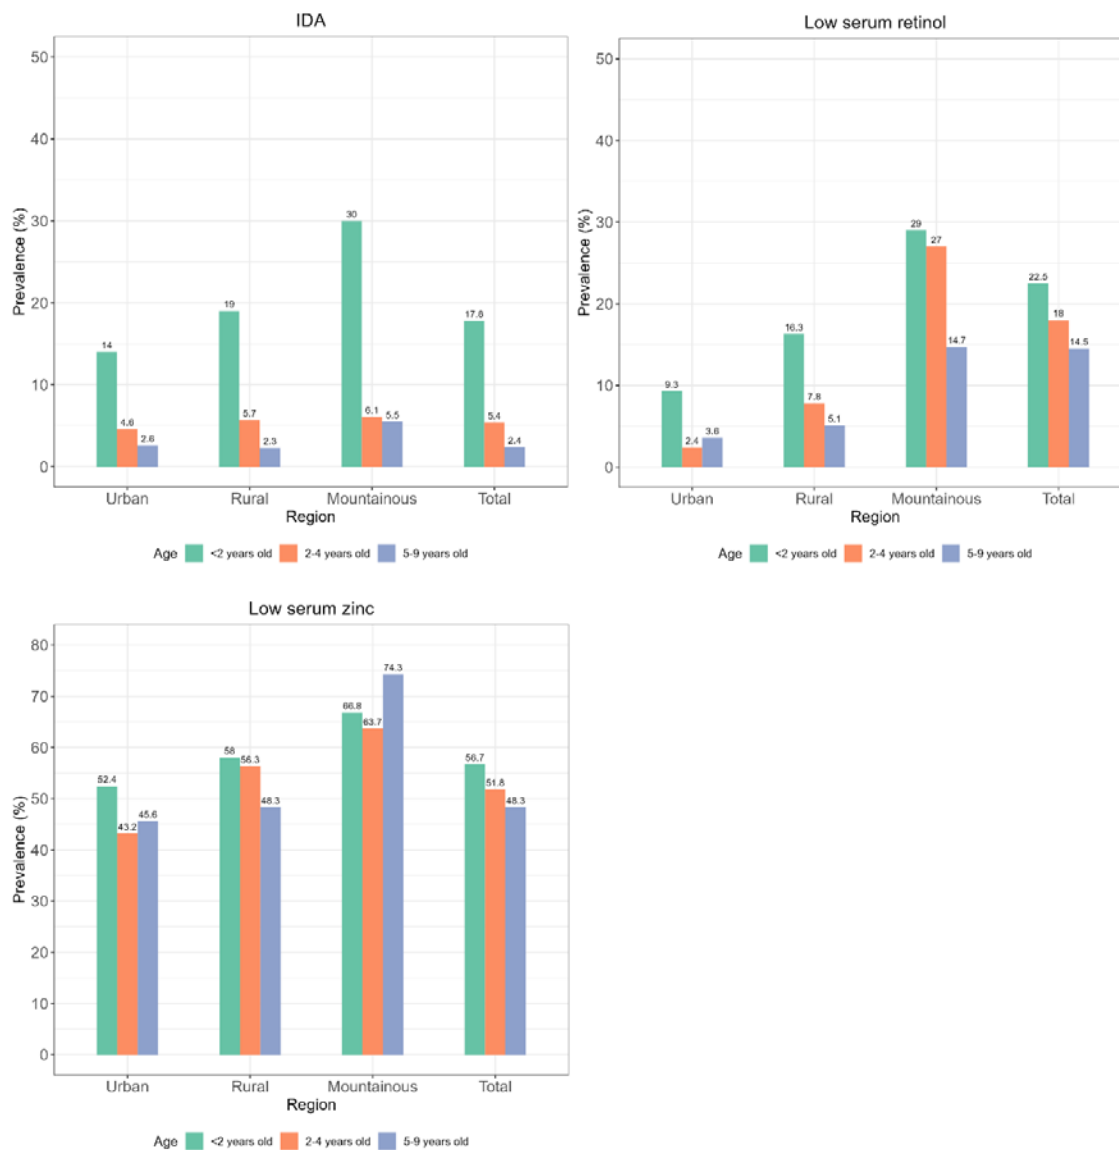

297

298

299 **Figure 1: Prevalence of different forms of malnutrition by area of residence and age**  
 300 **group among Vietnamese children.** A) Stunting. B) Underweight. C) Wasting/thinness. D)  
 301 Overweight and obesity. E) Anaemia. F) Iron deficiency. G) Iron deficiency anaemia. H) Low  
 302 serum retinol. I) Low serum zinc. Prevalence was estimated based on sampling weight.  
 303 ID, iron deficiency; IDA, iron deficiency anaemia.

304 **Associations of malnutrition and MNDs with demographic and socioeconomic**  
 305 **indicators**

306 The associations of demographic and socioeconomic indicators with malnutrition (under and  
 307 overnutrition), and MNDs are reported in **Table 2** and **Table 3**, respectively. Compared to the  
 308 youngest children (<2 years old), children aged 2-4 years old had a greater likelihood of  
 309 being stunted [OR (95% CI): 1.43 (1.20, 1.72)] and school children (5-9 years old) had a  
 310 greater likelihood of being wasted [2.48 (1.49, 4.14)] (**Table 2**). In addition, children aged 2-

311 4 years old had significantly increased odds of underweight [1.70 (1.29, 2.23)] and  
312 overweight [1.75 (1.14, 2.70)], and the odds further increased in older children aged 5-9 years  
313 old [2.46 (1.70, 3.56); 10.02 (6.71, 14.97), respectively]. However, opposite trends were  
314 observed between age and MNDs. Compared to the youngest children, children aged 2-4  
315 years old had significantly reduced odds of anaemia [0.30 (0.25, 0.37)], low serum retinol  
316 [0.32 (0.25, 0.42)] and low serum zinc [0.82 (0.69, 0.97)] (**Table 3**). The odds of anaemia  
317 [0.24 (0.19, 0.31)], ID [0.11 (0.07, 0.18)], IDA [0.11 (0.07, 0.18)] and low serum retinol [0.21  
318 (0.15, 0.29)] were further reduced in older children aged 5-9 years old (**Table 3**).

319 Males were more likely to be overweight [1.43 (1.16, 1.76)] and affected by anaemia  
320 [1.23 (1.02, 1.48)], ID [1.50 (1.22, 1.85)] and IDA [1.50 (1.22, 1.85)] compared to females  
321 (**Table 2 and 3**). Children from the mountainous areas had increased odds of stunting [5.06  
322 (1.81, 14.42)], underweight [2.98 (1.50, 5.92)], low serum zinc [2.29 (1.70, 3.09)] and  
323 anaemia [2.07 (1.46, 2.94)] compared to the urban areas. Children from the ethnic minorities  
324 had increased odds of stunting [5.94 (3.78, 9.36)], underweight [3.68 (2.81, 4.82)] and all  
325 MNDs investigated (OR ranging from 1.93-2.34), and reduced odds of overweight [0.15  
326 (0.07, 0.34)]. The odds of being stunted and underweight were significantly decreased across  
327 the wealth index quintiles in a dose-dependent manner, with children from the richest quintile  
328 (Q5) were most protected against stunting [0.13 (0.05, 0.32)], and underweight [0.17 (0.10,  
329 0.29)], compared to the poorest quintile (Q1) (**Table 2**). In contrast, children from greater  
330 wealth index quintiles (Q2-Q5) had significantly increased odds of overweight (OR ranging  
331 from 2.6-2.9). In addition, children from the richest quintile (Q5) were also protected against  
332 anaemia [0.55 (0.40, 0.76)], ID [0.46 (0.28, 0.77)], and IDA [0.46 (0.28, 0.77)], low serum  
333 retinol [0.41 (0.24, 0.72)] and low serum zinc [0.43 (0.30, 0.64)] (**Table 3**).

334 Compared to Northern mountains, children from Southeast and Mekong River Delta  
335 had reduced odds of stunting [0.19 (0.05, 0.74); and 0.28 (0.09, 0.91)], but had increased  
336 odds of overweight [3.88 (2.07, 7.25); and 2.90 (1.46, 5.79)], respectively (**Table 2**). Children  
337 from Red River Delta and Southeast had also reduced odds of underweight [0.44 (0.19, 0.99);  
338 and 0.21 (0.09, 0.47), respectively]. Moreover, children from the Red River Delta and  
339 Southeast were less likely to be affected by anaemia, IDA and low serum zinc (OR ranging  
340 from 0.49-0.66) (**Table 3**).

341 **Table 2: Univariate logistic regressions between malnutrition and demographic and socioeconomic indicators in Vietnamese children**

| Variables                              | Stunting<br>OR (95% CI) | Underweight<br>OR (95% CI) | Wasting/Thinness<br>OR (95% CI) | Overweight<br>OR (95% CI) |
|----------------------------------------|-------------------------|----------------------------|---------------------------------|---------------------------|
| Age (<2 years)                         | Ref                     | Ref                        | Ref                             | Ref                       |
| 2-4 years                              | 1.43 (1.20, 1.72)***    | 1.70 (1.29, 2.23)**        | 0.76 (0.49, 1.17)               | 1.75 (1.14, 2.70)*        |
| 5-9 years                              | 1.10 (0.84, 1.45)       | 2.46 (1.70, 3.56)***       | 2.48 (1.49, 4.14)**             | 10.02 (6.71, 14.97) ***   |
| Sex (Females)                          | Ref                     | Ref                        | Ref                             | Ref                       |
| Males                                  | 1.03 (0.85, 1.25)       | 0.93 (0.76, 1.14)          | 0.90 (0.61, 1.33)               | 1.43 (1.16, 1.76)**       |
| Area of residence (Urban)              | Ref                     | Ref                        | Ref                             | Ref                       |
| Rural                                  | 1.45 (0.86, 2.46)       | 1.32 (0.86, 2.02)          | 1.46 (0.90, 2.37)               | 0.71 (0.46, 1.10)         |
| Mountainous                            | 5.06 (1.81, 14.42)**    | 2.98 (1.50, 5.92)**        | 1.54 (0.59, 4.03)               | 0.25 (0.08, 0.77)*        |
| Ethnicity (Kinh)                       | Ref                     | Ref                        | Ref                             | Ref                       |
| Others                                 | 5.94 (3.78, 9.36)***    | 3.68 (2.81, 4.82)***       | 1.56 (0.71, 3.44)               | 0.15 (0.07, 0.34)***      |
| Geographical area (Northern mountains) | Ref                     | Ref                        | Ref                             | Ref                       |
| Red River Delta                        | 0.29 (0.09, 0.96)*      | 0.44 (0.19, 0.99)*         | 1.01 (0.52, 1.96)               | 1.87 (0.97, 3.60)         |
| North Central and Central Coastal      | 0.50 (0.14, 1.75)       | 0.55 (0.21, 1.45)          | 0.86 (0.48, 1.56)               | 1.62 (0.86, 3.07)         |
| Central Highlands                      | 0.76 (0.17, 3.42)       | 1.09 (0.35, 3.36)          | 2.03 (0.74, 5.57)               | 1.38 (0.54, 3.50)         |
| Southeast                              | 0.19 (0.05, 0.74)*      | 0.21 (0.09, 0.47)**        | 0.71 (0.32, 1.60)               | 3.88 (2.07, 7.25)***      |
| Mekong River Delta                     | 0.28 (0.09, 0.91)*      | 0.65 (0.29, 1.49)          | 1.25 (0.75, 2.10)               | 2.90 (1.46, 5.79)**       |
| Wealth index quintiles (Poorest; Q1)   | Ref                     | Ref                        | Ref                             | Ref                       |
| Poorer (Q2)                            | 0.40 (0.19, 0.82)*      | 0.46 (0.31, 0.68)**        | 1.02 (0.38, 2.71)               | 2.94 (1.20, 7.21)*        |
| Middle (Q3)                            | 0.23 (0.11, 0.50)**     | 0.27 (0.19, 0.40)***       | 0.59 (0.23, 1.49)               | 2.56 (1.04, 6.29)*        |
| Richer (Q4)                            | 0.20 (0.09, 0.43)***    | 0.26 (0.16, 0.43)***       | 0.65 (0.25, 1.67)               | 2.65 (1.13, 6.21)*        |
| Richest (Q5)                           | 0.13 (0.05, 0.32)***    | 0.17 (0.10, 0.29)***       | 0.50 (0.20, 1.27)               | 2.91 (1.20, 7.05)*        |

342 CI, confidence interval; OR, odds ratio; ref, reference.

343 Odds ratio and 95% confidence interval were estimated using univariate logistic regression analyses. 'Non-malnourished' groups were used as the reference group.

344 \* p<0.05; \*\* p<0.01; \*\*\* p<0.001.

345 **Table 3: Univariate logistic regressions between micronutrient deficiencies and demographic and socioeconomic indicators in Vietnamese children**

| Variables                              | Anaemia              | Iron deficiency      | Iron deficiency anaemia | Low serum retinol    | Low serum zinc       |
|----------------------------------------|----------------------|----------------------|-------------------------|----------------------|----------------------|
|                                        | OR (95% CI)          | OR (95% CI)          | OR (95% CI)             | OR (95% CI)          | OR (95% CI)          |
| Age (<2 years)                         | Ref                  | Ref                  | Ref                     | Ref                  | Ref                  |
| 2-4 years                              | 0.30 (0.25, 0.37)*** | 0.26 (0.21, 0.32)    | 0.26 (0.21, 0.32)       | 0.32 (0.25, 0.42)*** | 0.82 (0.69, 0.97)*   |
| 5-9 years                              | 0.24 (0.19, 0.31)*** | 0.11 (0.07, 0.18)*** | 0.11 (0.07, 0.18)***    | 0.21 (0.15, 0.29)*** | 0.71 (0.48, 1.08)    |
| Sex (Females)                          | Ref                  | Ref                  | Ref                     | Ref                  | Ref                  |
| Males                                  | 1.23 (1.02, 1.48)*   | 1.50 (1.22, 1.85)**  | 1.50 (1.22, 1.85)**     | 1.05 (0.83, 1.33)    | 1.11 (0.98, 1.25)    |
| Area of residence (urban)              | Ref                  | Ref                  | Ref                     | Ref                  | Ref                  |
| Rural                                  | 1.02 (0.70, 1.47)    | 1.01 (0.83, 1.22)    | 1.03 (0.80, 1.33)       | 1.07 (0.79, 1.47)    | 1.37 (0.92, 2.03)    |
| Mountainous                            | 2.07 (1.46, 2.94)*** | 1.09 (0.79, 1.51)    | 2.02 (1.32, 3.08)**     | 1.50 (0.88, 2.55)    | 2.29 (1.70, 3.09)*** |
| Ethnicity (Kinh)                       | Ref                  | Ref                  | Ref                     | Ref                  | Ref                  |
| Others                                 | 2.13 (1.72, 2.64)*** | 2.07 (1.35, 3.17)**  | 2.07 (1.35, 3.17)**     | 2.34 (1.44, 3.79)**  | 1.93 (1.46, 2.56)*** |
| Geographical area (Northern mountains) | Ref                  | Ref                  | Ref                     | Ref                  | Ref                  |
| Red River Delta                        | 0.58 (0.43, 0.79)**  | 0.91 (0.67, 1.23)    | 0.51 (0.33, 0.80)**     | 0.87 (0.50, 1.51)    | 0.49 (0.26, 0.94)*   |
| North Central and Central Coastal      | 0.56 (0.32, 0.98)*   | 0.99 (0.64, 1.53)    | 0.58 (0.33, 1.01)       | 1.20 (0.73, 1.95)    | 0.60 (0.33, 1.08)    |
| Central Highlands                      | 0.81 (0.56, 1.17)    | 1.11 (0.83, 1.48)    | 0.82 (0.54, 1.24)       | 1.025 (0.63, 1.66)   | 0.95 (0.63, 1.45)    |
| Southeast                              | 0.50 (0.37, 0.68)*** | 1.35 (0.99, 1.84)    | 0.66 (0.45, 0.98)*      | 1.17 (0.68, 2.02)    | 0.53 (0.30, 0.93)*   |
| Mekong River Delta                     | 0.55 (0.46, 0.67)*** | 1.23 (0.87, 1.73)    | 0.74 (0.46, 1.17)       | 1.435(0.77, 2.66)    | 0.72 (0.43, 1.22)    |
| Wealth index quintiles (Poorest; Q1)   | Ref                  | Ref                  | Ref                     | Ref                  | Ref                  |
| Poorer (Q2)                            | 1.08 (0.75, 1.55)    | 1.12 (0.73, 1.73)    | 1.12 (0.73, 1.73)       | 0.92 (0.52, 1.63)    | 0.77 (0.45, 1.31)    |
| Middle (Q3)                            | 0.63 (0.44, 0.90)*   | 0.69 (0.43, 1.10)    | 0.69 (0.43, 1.10)       | 0.71 (0.42, 1.20)    | 0.54 (0.37, 0.78)**  |
| Richer (Q4)                            | 0.75 (0.48, 1.19)    | 0.67 (0.41, 1.10)    | 0.67 (0.41, 1.10)       | 0.64 (0.36, 1.12)    | 0.67 (0.45, 0.98)*   |
| Richest (Q5)                           | 0.55 (0.40, 0.76)**  | 0.46 (0.28, 0.77)**  | 0.46 (0.28, 0.77)**     | 0.41 (0.24, 0.72)**  | 0.43 (0.30, 0.64)*** |

346 CI, confidence interval; OR, odds ratio; ref, reference.

347 Odds ratio and 95% confidence interval were estimated using univariate logistic regression analyses. ‘Micronutrient non-deficient’ groups were used as the reference group.

348 \* p<0.05; \*\* p<0.01; \*\*\* p<0.001.



349 **Associations of undernutrition and overnutrition with micronutrient deficiencies**

350 In the adjusted multivariate logistic regressions, children with anaemia [AOR (95% CI): 1.43  
351 (1.13, 1.82)], IDA [1.53 (1.22, 1.93)] and low serum zinc [1.44 (1.11, 1.88)] had significantly  
352 increased odds of stunting compared to the non-deficient children (**Table 4**). Children with  
353 low serum retinol [1.71 (1.21, 2.42)] and low serum zinc [1.51 (1.13, 2.01)] had increased  
354 odds of being underweight, and children with low serum retinol also had reduced odds of  
355 being overweight [0.43 (0.27, 0.68)]. When combining the number of MNDs occurring in  
356 each child, we found that children with three MNDs [1.96 (1.14, 3.37)] and children with four  
357 MNDs [1.84 (1.08, 3.13)] had increased odds of stunting, compared to those without MNDs.  
358 Similarly, children with two, three and four MNDs had increased odds of being underweight  
359 in a dose-dependent manner [1.48 (1.01, 2.17); 1.81 (1.17, 2.81); and 2.26 (1.17, 4.35),  
360 respectively]. Children with one, two and three MNDs were less likely to be overweight or  
361 obese [0.60 (0.44, 0.81); 0.38 (0.23, 0.63); and 0.44 (0.23, 0.85), respectively].

362 **Table 4: Univariate and multivariate logistic regressions between malnutrition and micronutrient deficiencies in Vietnamese children**

| Variables                                 | Stunting            |                     | Underweight        |                     | Wasting/Thinness    |                   | Overweight/obese     |                      |
|-------------------------------------------|---------------------|---------------------|--------------------|---------------------|---------------------|-------------------|----------------------|----------------------|
|                                           | OR (95% CI)         | AOR (95% CI)        | OR (95% CI)        | AOR (95% CI)        | OR (95% CI)         | AOR (95% CI)      | OR (95% CI)          | AOR (95% CI)         |
| Anaemia (No) <sup>b</sup>                 | Ref                 | Ref                 | Ref                | Ref                 | Ref                 | Ref               | Ref                  | Ref                  |
| Yes                                       | 1.39 (1.14, 1.70)** | 1.43 (1.13, 1.82)** | 1.09 (0.84, 1.42)  | 1.33 (0.99, 1.78)   | 0.79 (0.51, 1.24)   | 0.88 (0.53, 1.47) | 0.57 (0.38, 0.85)**  | 0.76 (0.50, 1.15)    |
| Iron deficiency (No) <sup>a</sup>         | Ref                 | Ref                 | Ref                | Ref                 | Ref                 | Ref               | Ref                  | Ref                  |
| Yes                                       | 1.17 (0.90, 1.52)   | 1.11 (0.88, 1.40)   | 0.81 (0.52, 1.25)  | 1.01 (0.68, 1.51)   | 0.49 (0.25, 0.95)*  | 0.65 (0.33, 1.26) | 0.63 (0.50, 0.79)**  | 1.07 (0.79, 1.44)    |
| Iron deficiency anaemia (No) <sup>a</sup> | Ref                 | Ref                 | Ref                | Ref                 | Ref                 | Ref               | Ref                  | Ref                  |
| Yes                                       | 1.52 (1.05, 2.18)*  | 1.53 (1.22, 1.93)*  | 1.00 (0.60, 1.67)  | 1.33 (0.76, 2.24)   | 0.44 (0.25, 0.76)** | 0.56 (0.32, 1.01) | 0.54 (0.35, 0.85)*   | 1.03 (0.58, 1.84)    |
| Low serum retinol (No) <sup>b</sup>       | Ref                 | Ref                 | Ref                | Ref                 | Ref                 | Ref               | Ref                  | Ref                  |
| Yes                                       | 1.55 (1.02, 2.36)*  | 1.40 (0.86, 2.30)   | 1.47 (1.04, 2.07)* | 1.71 (1.21, 2.42)** | 1.02 (0.60, 1.72)   | 1.21 (0.73, 1.99) | 0.34 (0.20, 0.57)*** | 0.43 (0.27, 0.68)*** |
| Low serum zinc (No) <sup>b</sup>          | Ref                 | Ref                 | Ref                | Ref                 | Ref                 | Ref               | Ref                  | Ref                  |
| Yes                                       | 1.49 (1.12, 1.97)** | 1.44 (1.11, 1.88)** | 1.43 (1.07, 1.91)* | 1.51 (1.13, 2.01)** | 1.15 (0.71, 1.87)   | 1.08 (0.66, 1.76) | 0.63 (0.37, 1.05)    | 0.65 (0.38, 1.10)    |
| Total number of MND (None) <sup>b</sup>   | Ref                 | Ref                 | Ref                | Ref                 | Ref                 | Ref               | Ref                  | Ref                  |
| 1                                         | 1.02 (0.74, 1.41)   | 1.05 (0.72, 1.51)   | 0.88 (0.68, 1.15)  | 0.98 (0.72, 1.34)   | 0.71 (0.42, 1.20)   | 0.87 (0.53, 1.44) | 0.48 (0.36, 0.63)*** | 0.60 (0.44, 0.81)**  |
| 2                                         | 1.51 (1.07, 2.14)*  | 1.58 (0.99, 2.52)   | 1.05 (0.76, 1.46)  | 1.48 (1.01, 2.17)*  | 0.69 (0.40, 1.21)   | 1.01 (0.57, 1.78) | 0.22 (0.15, 0.31)*** | 0.38 (0.23, 0.63)**  |
| 3                                         | 1.67 (1.17, 2.40)** | 1.96 (1.14, 3.37)*  | 0.95 (0.58, 1.54)  | 1.81 (1.17, 2.81)*  | 0.59 (0.29, 1.22)   | 0.92 (0.48, 1.77) | 0.16 (0.09, 0.29)*** | 0.44 (0.23, 0.85)*   |
| 4                                         | 1.58 (1.04, 2.40)*  | 1.84 (1.08, 3.13)*  | 1.05 (0.59, 1.89)  | 2.26 (1.17, 4.35)*  | 0.30 (0.07, 1.34)   | 0.49 (0.12, 2.06) | 0.31 (0.12, 0.79)*   | 1.12 (0.43, 2.92)    |

363 AOR, adjusted odds ratio; CI, confidence interval; MND, micronutrient deficiencies; OR, odds ratio; ref, reference.

364 Univariate and multivariate logistic regression analyses were performed and reported as OR (95% CI) and AOR (95% CI), respectively. 'Micronutrient non-deficient' groups were used as the reference group.

365 <sup>a</sup>adjusted by age, sex and area of residence; and <sup>b</sup>adjusted by age, sex, area of residence and inflammation.

366 \* p<0.05; \*\* p<0.01; \*\*\* p<0.001.

367

## 368 **Discussion**

### 369 **Prevalence of undernutrition, overnutrition, and MNDs**

370 To the best of our knowledge, this is the first reported population-based study in Vietnam to  
371 assess MNDs (anaemia, iron, vitamin A and zinc deficiencies) in children from a nationally  
372 representative nutrition survey that also considers the associations with nutritional status  
373 (defined by undernutrition and overnutrition). Findings from the GNS 2020 indicate that the  
374 TBM remains a major public health issue for Vietnamese children. This survey shows that the  
375 prevalence of stunting in children aged <2, and 2-4 years old was 10.9% and 15.0%,  
376 respectively, in 2020, suggesting that Vietnam is now on course to achieve Global Nutrition  
377 Targets which is to reduce the prevalence of stunting in children aged <5 years old by 40% in  
378 2025 compared to 2012 (<20%) (6, 24). Child stunting is now considered as ‘medium’ public  
379 health significance (<20%) in Vietnam according to WHO (24). In contrast, Vietnam is off  
380 course to meet the Global Nutrition Targets 2025 for childhood overweight and obesity,  
381 which is to prevent the figure from increasing. Increasing overweight and obesity in Vietnam  
382 is evident, particularly in school-aged children of urban areas (31%). This prevalence has  
383 been substantially increased compared to 8.5% in 2010 in children of same age (9). MNDs  
384 (low serum zinc, anaemia and ID) were widespread among children in Vietnam, although low  
385 serum retinol was of less concern (<7%). In line with previous findings, this survey reveals  
386 that more than half of the Vietnamese children aged 6 months to 9 years old had low serum  
387 zinc status (25, 26). Anaemia and ID affected 15% and 13% of the study participants,  
388 respectively.

### 389 **Demographic variation and socioeconomic inequalities in undernutrition, overnutrition** 390 **and MNDs**

391 Our findings demonstrated regional and demographic variation and socioeconomic  
392 inequalities in child malnutrition in Vietnam. Prevalence of childhood overweight and obesity  
393 was higher in males, living in urban areas and richer families. This may be due to better  
394 economic growth, and improved standard of living and nutrition (27). Evidence from reviews  
395 and longitudinal studies reported that unhealthy diets especially consumption of sugary  
396 sweetened beverages and fast foods, physical inactive, and lack of sleep are the major risk  
397 factors for overweight and obesity in Vietnamese school-aged children and adolescents,  
398 particularly in developed areas (9, 28, 29). In addition, maternal obesity, gestational diabetes  
399 during pregnancy, and suboptimal feeding practices are significant contributors for early

400 childhood overweight (9, 28, 29). However, there is limited data on the key determinants and  
401 effective strategies to address childhood overweight and obesity in this region, thus future  
402 research is warranted.

403 In this study, the prevalence of stunting, underweight and MNDs was high in infants  
404 and young children, particularly in children from the ethnic minorities, rural and mountainous  
405 areas, and poorer families. Previous evidence reported that ethnic minorities living in poor  
406 and remote rural and mountainous areas had limited economic, social, or cultural support  
407 including education and health services compared to the major ethnic groups (Kinh or Hoa)  
408 (10, 30). This results in large disparities in nutrition outcomes, and persistent high prevalence  
409 of child undernutrition and MNDs (31). The Food Agriculture Organization (FAO) Report  
410 also postulated that potential explanatory factors include climate change, conflict and slowed  
411 economic development, all of which contributes to an increased socioeconomic inequality in  
412 food insecurity and malnutrition between urban and rural regions (32). More efforts and  
413 attention are needed to reduce inequality gap in relation to socioeconomic status among  
414 ethnic minorities or vulnerable populations living in the poor, remote mountainous areas (33).  
415 Thus, national policies and intervention programmes should address age-specific, sex-  
416 specific, geographical and socioeconomic disparities to ensure it reaches people at greatest  
417 risk and in greatest need.

#### 418 **Low serum zinc**

419 More than half of the Vietnamese children were affected by low serum zinc status.  
420 However, caution needs to be taken when assessing and interpreting zinc deficiency using  
421 plasma or serum samples, as many factors may affect plasma or serum zinc concentration  
422 such as the time when blood was collected, meal consumption, fasting or non-fasting status  
423 and inflammation (34). Another concern is that the potential contamination of blood samples  
424 may underestimate the prevalence of zinc deficiency. To date, there is no consensus on which  
425 indicators are best to assess zinc status, making it difficult to compare and assess the extent of  
426 zinc deficiency of a population (34). Nonetheless, plasma or serum zinc is still a frequently  
427 used biomarker at population level (35). Household Living Standards Survey 2016 reported  
428 that rice was the most common food item consumed by Vietnamese population (almost 300g  
429 per person per day), and it was the only staple food consumed by nearly all households (36).  
430 However, rice contains very low amount of zinc and high amount of phytic acid, which will  
431 bind to zinc and form phytate salts that further inhibit zinc and iron absorption (37). Previous

432 evidence suggested that animal-based foods e.g., fish, poultry, red meat or liver and dairy  
433 products e.g., milk and cheese are key contributors to zinc intake in this population (37, 38),  
434 thus increase consumption of these food items may have positive impact on zinc status. More  
435 effective public health solutions can be achieved through zinc supplementations (39) or bio-  
436 fortification of zinc rich foods e.g., zinc bio-fortified maize, wheat or rice (40).

#### 437 **Low serum retinol**

438 Low serum retinol can lead to impaired immune system which subsequently increases  
439 the risk of infectious diseases, and child morbidity and mortality (41). In 2012, Laillou et al.  
440 reported that 11.8% and 11.9% of the children aged <2 and 2-5 years old had low serum  
441 retinol (26). Concerningly, within a decade, the prevalence of low serum retinol has increased  
442 substantially, with 22.5% children aged <2 years old, and 18.0% of children aged 2-5 years  
443 old in this study were found to have low serum retinol, respectively. However, such  
444 discrepancies may be partly due to urban-rural difference as larger proportion of children in  
445 this survey were from rural areas (77.6% vs. 48.4%). Notably, Vietnam has stipulated  
446 mandatory vitamin A fortification in sugar and vegetable oil (42) and implemented vitamin A  
447 supplementation programme targeted at children aged 6-36 months since 1997 with a  
448 population coverage of 99% in 2000, which may have substantially contributed to the  
449 reduction of vitamin A deficiency (43). However, the coverage of vitamin A distribution in  
450 children from poor, remote and mountainous areas is still lower than other areas (43). This  
451 may explain the high prevalence of low serum retinol in mountainous areas (14.7-29.0%)  
452 than in urban areas (<10%). It is therefore relevant that findings from this study inform the  
453 current design of vitamin A supplementation or fortification programmes, to ensure it reaches  
454 the vulnerable populations that are most in need. Promotion of the consumption of vitamin A-  
455 rich fruits and vegetables should also be encouraged to sustainably combat vitamin A  
456 deficiency. Integration of deworming treatments into an existing vitamin A supplementation  
457 may be considered to improve child's vitamin A status especially in areas with high burden of  
458 infection.

#### 459 **Anaemia and iron deficiency (ID)**

460 Our findings underscore that anaemia and ID were more prevalent among children  
461 aged <2 years old, males and those living in the mountainous areas. Higher prevalence of  
462 anaemia in children aged <2 years old have been reported in many other populations (44, 45),  
463 but not all (46). In the first 4–6 months of life, iron supply acquired in utero is sufficient to

464 meet requirements of infants with unimpaired intrauterine supply, whereas after 6 months, the  
465 intrauterine-supplied iron becomes insufficient due to accelerated growth and development,  
466 leading to increased risk of deficiency (47). Due to immaturity of gut microbiome and  
467 immune system, infants and young children are more susceptible to infections and diseases,  
468 leading to increased risk of nutritional deficiencies (48). Increased risk of anemia in males  
469 during early childhood than in females have also been reported in many studies (49-52).  
470 Previous studies reported significantly lower cord serum ferritin levels and higher cord sTfR  
471 in males than in females at birth and at first 2 years of life, which suggests that males were at  
472 greater risk of low iron status (53). Although the underlying mechanisms are unknown, but  
473 this mechanism may be explained by hormone-mediated differences in metabolism e.g.,  
474 increased erythropoietin activity for red blood cell production in males may result in low iron  
475 store (54). Differences in the proportion of lean and fat mass and weight gain (e.g., greater  
476 weight gain in males) may also indirectly affect iron metabolism (55).

477 ID is frequently reported as the main nutritional contributor to anaemia, but the  
478 aetiology of anemia is complex, multifactorial and context-specific (56). Our findings  
479 indicate that nearly one third of the anaemia cases in Vietnamese children were attributable to  
480 ID. The proportion of anaemia attributable to ID was highest in children aged <2 years old  
481 (57%) compared to older children aged 5-9 years old (24.4%). This finding was in line with  
482 previous evidence reported that the prevalence of anaemia attributable to ID was highest in  
483 the 1–4 age group, and then gradually decreased up to the 25–29 age group (50). Cautious  
484 need to be taken when interpreting the results as unmeasured factors such as high burden of  
485 disease and infection or haemoglobinopathies may overestimate the proportion of anaemia  
486 accounted for by ID (57). Other important known risk factors of child anaemia include  
487 nutritional deficiencies (e.g., iron, vitamin A, folate, vitamin B12), environmental factors,  
488 chronic comorbidities (e.g., infection, intestinal parasites, malaria), and congenital or genetic  
489 disorders (e.g., sickle cell,  $\alpha$ -thalassemia), which are further complicated by socioeconomic  
490 and ecological risk factors (58). Therefore, these risk factors should be considered when  
491 investigating the underlying causes of anaemia, to develop appropriate and effective  
492 integrated interventions to prevent and treat child anemia in this population.

#### 493 **Associations between MNDs and undernutrition and overnutrition**

494 Our findings showed that MNDs were highly associated with child stunting and underweight.  
495 Inadequate intake of micronutrients especially iron, zinc and retinol, A and C may result in

496 growth retardation (59). Poor energy and nutrient diets are known as the main cause of both  
497 stunting and MNDs, other factors include those associated with poverty or poor  
498 socioeconomic development such as poor sanitation and hygiene, infection, poor maternal  
499 nutrition and feeding practices (60). Despite excessive energy consumption, previous  
500 evidence demonstrated that children living with overweight and obesity were more likely to  
501 be affected by MNDs, and this may be primarily due to poor nutrient energy-dense diets that  
502 low in micronutrient content (61). In contrast, opposite results were found in our study,  
503 overweight was protective against the development of multiple forms of MNDs. The possible  
504 explanations include overweight and obese children consume more to meet their nutritional  
505 requirements or the fortification of certain processed foods (62). To date, the direction of  
506 association between overnutrition and MNDs are still unknown (63), it is unclear whether  
507 specific MNDs contribute to the increasing risk of greater obesity and adiposity, or increased  
508 overweight and adiposity resulted in specific MNDs, or maybe both. The link between  
509 overnutrition and MNDs is further complicated by the nutrient density as diets containing  
510 similar energy content can vary in terms of micronutrients that they provide (64). Thus, future  
511 research is warranted to shed light the relationship between overnutrition and MNDs.

#### 512 **Strategies to address child undernutrition, MNDs, and overnutrition**

513 Child undernutrition and MNDs were more prevalent among younger children aged <2 years  
514 old in this study, highlighting the importance of optimising nutrition in early life in  
515 alleviating undernutrition and MNDs for Vietnamese children. Adequate maternal nutrition  
516 and early childhood nutrition especially during the first 1000 days of life, is essential to  
517 ensure optimal growth and development of children to their full potential (65). Thus,  
518 interventions targeted at the first 1000 days of life such as multi-micronutrients  
519 supplementation and food fortification during pregnancy and infancy, nutrition education to  
520 optimise infant and young children feeding (IYCF) practices (e.g., breastfeeding and  
521 complementary feeding) and promoting dietary diversification using locally available  
522 micronutrient-rich foods may help to tackle multiple forms of malnutrition in infant and  
523 young children (66).

524 In recent years the Vietnamese government has published and implemented a National  
525 Nutrition Strategy 2021-2030 with a vision to 2040, which included targets and indicators on  
526 overweight and obesity in children and adolescents (9). However, the current policies and  
527 guidelines in Vietnam were not specifically designed to address childhood overweight and

528 obesity, rather all the programmes were integrated or designed as a small part of broader  
529 public health strategies (67). Such policies and guidelines included tax for sugary-sweetened  
530 beverages (SBB), nutrition labelling, restriction on unhealthy food marketing in school  
531 campus, physical activity programmes and national dietary guidelines. More obesity  
532 prevention research is warranted to provide sufficient evidence to inform policy decision to  
533 address childhood overweight and obesity. It is also essential to raise public awareness about  
534 the consequences and risk factors of overweight and obesity to generate demands for  
535 healthier options and strengthen nutrition education to promote healthy eating behaviour and  
536 lifestyle in children and parents/caregivers.

### 537 **Strengths and limitations**

538 This study had some notable strengths. The nationally representative sample of Vietnamese  
539 children allows the findings to be generalized across the country. Stratified analyses by age  
540 groups, area of residence and sex provide insights on the vulnerable population in Vietnam  
541 who are at the greatest risk of developing multiple forms of malnutrition. This finding helps  
542 to better tailor interventions, ensuring they reach the populations that most in needs to  
543 improve outcomes. There were few limitations in this study. As in all observational studies,  
544 this study was limited by confounding and causality should not be inferred. Food  
545 consumption data in children was not available in the GNS 2020, thus analysis of the  
546 association between food intake and child nutritional status was not possible.

### 547 **Conclusion**

548 Our findings indicate that the TBM is becoming a major public health concern for  
549 Vietnamese children. Demographic variation and socioeconomic inequalities in TBM remain  
550 a critical challenge for policymakers. Child undernutrition and MNDs are more prevalent in  
551 infants and young children, particularly in children from the ethnic minorities, rural and  
552 mountainous areas and poor families. Whereas increasing childhood overweight and obesity  
553 are evident, particularly in males, school aged children from urban areas and rich families.  
554 Thus, national policies and intervention programmes in Vietnam should address age-specific,  
555 sex-specific, geographical and socioeconomic disparities to ensure equitable access and  
556 opportunities for all, and to accelerate progress in improving child nutrition. Existing food  
557 and nutrition programmes and policies need to be redesigned to use a multisectoral, double-  
558 duty approach to simultaneously address all forms of child malnutrition.

### 559 **Funding**



560 This work was undertaken as part of the project entitled “Addressing micronutrient  
561 deficiencies associated with the double burden of childhood malnutrition in China, a  
562 combined food system framework” which funded by UK Biotechnology and Biological  
563 Sciences Research Council (BBSRC) (Grant number: BB/T008989/1).

#### 564 **Competing interests**

565 The authors are not aware of any affiliations, memberships, funding, or financial holdings  
566 that might be perceived as affecting the objectivity of this review.

#### 567 **Data availability statement**

568 The datasets presented in this article are not publicly available. This dataset is the property of  
569 the National Institute of Nutrition (NIN), Vietnam, and is available for research purposes on  
570 reasonable request. Requests to access the dataset should be directed to  
571 [ninvietnam@viendinhduong.vn](mailto:ninvietnam@viendinhduong.vn).

#### 572 **Ethics statement**

573 Ethical approval was not required for secondary analysis in this study. The GNS 2020 was  
574 reviewed and approved by the Ethical Committee of the National Institute of Nutrition (NIN),  
575 Ministry of Health, Vietnam. All methods were conducted in accordance with the guidelines  
576 laid down in the Declaration of Helsinki. Written informed consent was obtained from each  
577 participant prior to data collection by NIN. Research team from the University of Leeds (UoL)  
578 (PYT, VSS, and XT) were permitted to access a sub-set of the anonymised GNS 2020 dataset.  
579 The UoL research team created the do files with STATA commands for analysis, and SN and  
580 TDT from the NIN were responsible for checking and running the commands on the full  
581 GNS 2020 dataset in STATA.

#### 582 **Acknowledgment**

583 This work was conducted under a partnership agreement between the University of Leeds,  
584 National Institute of Nutrition, Vietnam, and International Life Sciences Institute Southeast  
585 Asian Region (ILSI SEAR). The authors would also like to extend their gratitude to the  
586 National Institute of Nutrition, Ministry of Health, Vietnam, for their support in providing  
587 access to the GNS 2020 dataset.

#### 588 **Contributors**

589 YYG, TNT, VKT, LD and PYT contributed to developing the concept of this work and the  
590 secondary analysis plan using data from GNS 2020. NTT and VTK contributed to the  
591 methodology design and local implementation of the study. DTT and NDS prepared the GNS  
592 2020 dataset required for analysis. PYT, VSS, XT and NDS contributed to data cleaning and  
593 checking, performed statistical analysis, and interpreted and revised results. XT contributed  
594 to data visualisation (graph). PYT and VSS drafted the first version of manuscript. All  
595 authors provided input into the interpretation of the analyses presented in the manuscript. All  
596 authors edited and approved the final manuscript. YYG had oversight of this work. YYG  
597 (Principal investigator) and LD, JBM, SC, HE and XL (co-investigators) acquired funding for  
598 this work.

### 599 **Patient and public involvement**

600 Patients and/or the public were not involved in the design, or conduct, or reporting, or  
601 dissemination plans of this research.

### 602 **References:**

- 603 1. Nugent R, Levin C, Hale J, et al. Economic effects of the double burden of  
604 malnutrition. *Lancet* 2020;395(10218):156-64.
- 605 2. Ahmed T, Hossain M, Sanin KI. Global burden of maternal and child undernutrition  
606 and micronutrient deficiencies. *Ann Nutr Metab* 2012;61(Suppl 1):8-17.
- 607 3. Zhou LY, Deng MQ, Zhang Q, et al. Early-life nutrition and metabolic disorders in  
608 later life: a new perspective on energy metabolism. *Chin Med J (Engl)* 2020;133(16):1961-70.
- 609 4. Wells JC, Sawaya AL, Wibaek R, et al. The double burden of malnutrition:  
610 aetiological pathways and consequences for health. *Lancet* 2020;395(10217):75-88.
- 611 5. Martorell R. Improved nutrition in the first 1000 days and adult human capital and  
612 health. *Am J Hum Biol* 2017;29(2):10.
- 613 6. Ministry of Health. National Nutrition Strategy for 2011–2020 with a vision toward  
614 2030. Hanoi: Medical Publishing House 2011.
- 615 7. Ministry of Health. Vietnam General Nutrition Survey 2000. Hanoi: Medical  
616 Publishing House 2003.
- 617 8. Ministry of Health. Vietnam General Nutrition Survey 2009–2010. Hanoi: Medical  
618 Publishing House 2011.
- 619 9. Minh HV, Khuong QL, Tran TA, et al. Childhood overweight and obesity in Vietnam:  
620 a landscape analysis of the extent and risk factors. *Inquiry* 2020;60(Jan-Dec  
621 2023):60:00469580231154651.
- 622 10. Kien VD, Lee HY, Nam YS, et al. Trends in socioeconomic inequalities in child  
623 malnutrition in Vietnam: findings from the Multiple Indicator Cluster Surveys, 2000-2011.  
624 *Glob Health Action* 2016;9:29263.
- 625 11. Bailey RL, West KP Jr, Black RE. The epidemiology of global micronutrient  
626 deficiencies. *Ann Nutr Metab* 2015;66(Suppl 2):22-33.
- 627 12. Via M. The malnutrition of obesity: micronutrient deficiencies that promote diabetes.  
628 *ISRN Endocrinol* 2012;2012:103472.

- 629 13. Stevens GA, Beal T, Mbuya MNN, et al. Micronutrient deficiencies among preschool-  
630 aged children and women of reproductive age worldwide: a pooled analysis of individual-  
631 level data from population-representative surveys. *Lancet Glob Health* 2022;10(11):e1590-e9.  
632 14. Lopes SO, Abrantes LCS, Azevedo FM, et al. Food insecurity and micronutrient  
633 deficiency in adults: a systematic review and meta-analysis. *Nutrients* 2023;15(5):1074.  
634 15. Kobylinska M, Antosik K, Decyk A, et al. Malnutrition in obesity: Is it possible?  
635 *Obes Facts* 2022;15(1):19-25.  
636 16. Osendarp SJM, Brown KH, Neufeld LM, et al. The double burden of malnutrition-  
637 further perspective. *Lancet* 2020;396(10254):813.  
638 17. WHO Multicentre Growth Reference Study Group. WHO Child Growth Standards  
639 based on length/height, weight and age. *Acta Paediatr Suppl* 2006;450:76-85.  
640 18. de Onis M, Onyango AW, Borghi E, et al. Development of a WHO growth reference  
641 for school-aged children and adolescents. *Bull World Health Organ* 2007;85(9):660-7.  
642 19. World Health Organization. Haemoglobin concentrations for the diagnosis of anemia  
643 and assessment of severity. Geneva: World Health Organization 2011.  
644 20. World Health Organization. WHO guideline on use of ferritin concentrations to assess  
645 iron status in individuals and populations. Geneva: World Health Organization 2020.  
646 21. World Health Organization. Serum retinol concentrations for determining the  
647 prevalence of vitamin A deficiency in populations. Geneva: World Health Organization 2011.  
648 22. Group IZiNCG. Assessing population zinc status with serum zinc concentration.  
649 Oakland: International Zinc Nutrition Consultative Group 2012.  
650 23. Rutstein SO, Staveteig S. Making the Demographic and Health Surveys wealth index  
651 comparable: DHS methodological reports No. 9. Rockville, Maryland: ICF International  
652 2013.  
653 24. World Health Organization. Global nutrition targets 2025: policy brief series  
654 (WHO/NMH/NHD/14.2). Geneva: World Health Organization 2014.  
655 25. Hoang NPL, Nguyen ST, Tran TN, et al. Micronutrient status of primary school  
656 children with high risk of stunting and stunting in Nghia Dan district, Nghe An province,  
657 2013–2014. *J Prevent Med* 2021;27:32-7.  
658 26. Laillou A, Pham TV, Tran NT, et al. Micronutrient deficits are still public health issues  
659 among women and young children in Vietnam. *PLoS One* 2012;7(4):e34906.  
660 27. Nguyen MD, Beresford SA, Drewnowski A. Trends in overweight by socio-economic  
661 status in Vietnam: 1992 to 2002. *Public Health Nutr* 2007;10(2):115-21.  
662 28. Nguyen T, Trat T, Tieu NT, et al. Key informants' perspectives on childhood obesity in  
663 Vietnam: a qualitative study. *Matern Child Health J* 2022;26(9):1811-9.  
664 29. Nguyen T, Sokal-Gutierrez K, Lahiff M, et al. Early childhood factors associated with  
665 obesity at age 8 in Vietnamese children: The Young Lives Cohort Study. *BMC Public Health*  
666 2021;21(1):301.  
667 30. Beal T, Le DT, Trinh TH, et al. Child stunting is associated with child, maternal, and  
668 environmental factors in Vietnam. *Matern Child Nutr* 2019;15(4):e12826.  
669 31. Harris J, Huynh P, Nguyen HT, et al. Nobody left behind? Equity and the drivers of  
670 stunting reduction in Vietnamese ethnic minority populations. *Food Security* 2021;13(4):803-  
671 18.  
672 32. Boliko MC. FAO and the situation of food security and nutrition in the world. *J Nutr*  
673 *Sci Vitaminol (Tokyo)* 2019;65(Supplement):S4-S8.  
674 33. Mbuya NVN, Atwood SJ, Huynh PN. Persistent malnutrition in ethnic minority  
675 communities of Vietnam: issues and options for policy and interventions. Washington, DC:  
676 World Bank 2019.  
677 34. Wieringa FT, Dijkhuizen MA, Fiorentino M, et al. Determination of zinc status in  
678 humans: which indicator should we use? *Nutrients* 2015;7(5):3252-63.

- 679 35. Hess SY, Peerson JM, King JC, et al. Use of serum zinc concentration as an indicator  
680 of population zinc status. *Food Nutr Bull* 2007;28(3 Suppl):S403-29.
- 681 36. Kim C, Alvarez C, Sattar A, et al. Production, consumption, and food security in  
682 Vietnam: diagnostic overview. Hanoi: IFPRI and FAO 2019.
- 683 37. Gupta RK, Gangoliya SS, Singh NK. Reduction of phytic acid and enhancement of  
684 bioavailable micronutrients in food grains. *J Food Sci Technol* 2015;52(2):676-84.
- 685 38. Gibson RS, Yeadall F, Drost N, et al. Dietary interventions to prevent zinc deficiency.  
686 *Am J Clin Nutr* 1998;68(2 Suppl):484S-7S.
- 687 39. Mayo-Wilson E, Imdad A, Junior J, et al. Preventive zinc supplementation for  
688 children, and the effect of additional iron: a systematic review and meta-analysis. *BMJ Open*  
689 2014;4(6):e004647.
- 690 40. Prahara S, Skalicky M, Maitra S, et al. Zinc biofortification in food crops could  
691 alleviate the zinc malnutrition in human health. *Molecules* 2021;26(12):3509.
- 692 41. West KP Jr. Vitamin A deficiency disorders in children and women. *Food Nutr Bull*  
693 2003;24(4 Suppl):S78-90.
- 694 42. Tran VK, Spohrer R, Le TD, et al. Micronutrient deficiency control in Vietnam from  
695 policy and research to implementation: keys for success, challenges and lessons learned. *J*  
696 *Nutr Sci Vitaminol (Tokyo)* 2015;61:S198-200.
- 697 43. Khan NC, Khoi HH, Giay T, et al. Control of vitamin A deficiency in Vietnam:  
698 achievements and future orientation. *Food Nutr Bull* 2002;23(2):133-43.
- 699 44. Elmardi KA, Adam I, Malik EM, et al. Anaemia prevalence and determinants in under  
700 5 years children: findings of a cross-sectional population-based study in Sudan. *BMC Pediatr*  
701 2020;20(1):538.
- 702 45. Alvarez-Uria G, Naik PK, Midde M, et al. Prevalence and severity of anaemia  
703 stratified by age and gender in rural India. *Anemia* 2014;2014:176182.
- 704 46. Sun J, Wu H, Zhao M, et al. Prevalence and changes of anemia among young children  
705 and women in 47 low- and middle-income countries, 2000-2018. *EClinicalMedicine*  
706 2021;41:101136.
- 707 47. Schumann K, Solomons NW. Perspective: What makes it so difficult to mitigate  
708 worldwide anemia prevalence? *Adv Nutr* 2017;8(3):401-8.
- 709 48. Sanidad KZ, Zeng MY. Neonatal gut microbiome and immunity. *Curr Opin Microbiol.*  
710 2020;56:30-7.
- 711 49. Guo Y, Yu L, Wu ZY, et al. Gender-specific association between serum ferritin and  
712 neurodevelopment in infants aged 6 to 12 months. *Sci Rep* 2023;13(1):2490.
- 713 50. Safiri S, Kolahi AA, Noori M, et al. Burden of anemia and its underlying causes in  
714 204 countries and territories, 1990-2019: results from the Global Burden of Disease Study  
715 2019. *J Hematol Oncol* 2021;14(1):185.
- 716 51. Joo EY, Kim KY, Kim DH, et al. Iron deficiency anemia in infants and toddlers.  
717 *Blood Res* 2016;51(4):268-73.
- 718 52. Domellof M, Lonnerdal B, Dewey KG, et al. Sex differences in iron status during  
719 infancy. *Pediatrics* 2002;110(3):545-52.
- 720 53. Hay G, Refsum H, Whitelaw A, et al. Predictors of serum ferritin and serum soluble  
721 transferrin receptor in newborns and their associations with iron status during the first 2 y of  
722 life. *Am J Clin Nutr* 2007;86(1):64-73.
- 723 54. Choi JW, Kim CS, Pai SH. Erythropoietic activity and soluble transferrin receptor  
724 level in neonates and maternal blood. *Acta Paediatr* 2000;89(6):675-9.
- 725 55. Lozoff B. Iron deficiency and child development. *Food Nutr Bull* 2007;28(4  
726 Suppl):S560-71.
- 727 56. Miller JL. Iron deficiency anemia: a common and curable disease. *Cold Spring Harb*  
728 *Perspect Med* 2013;3(7):a011866.

- 729 57. Petry N, Olofin I, Hurrell RF, et al. The proportion of anemia associated with iron  
730 deficiency in low, medium, and high human development index countries: a systematic  
731 analysis of national surveys. *Nutrients* 2016;8(11):693.
- 732 58. Martinez-Torres V, Torres N, Davis JA, et al. Anemia and associated risk factors in  
733 pediatric patients. *Pediatric Health Med Ther* 2023;14:267-80.
- 734 59. Branca F, Ferrari M. Impact of micronutrient deficiencies on growth: the stunting  
735 syndrome. *Ann Nutr Metab* 2002;46(Suppl 1):8-17.
- 736 60. Millward DJ. Nutrition, infection and stunting: the roles of deficiencies of individual  
737 nutrients and foods, and of inflammation, as determinants of reduced linear growth of  
738 children. *Nutr Res Rev* 2017;30(1):50-72.
- 739 61. Calcaterra V, Verduci E, Milanta C, et al. Micronutrient deficiency in children and  
740 adolescents with obesity-a narrative review. *Children (Basel)* 2023;10(4):695.
- 741 62. McKay J, Ho S, Jane M, et al. Overweight & obese Australian adults and  
742 micronutrient deficiency. *BMC Nutr* 2020;6:12.
- 743 63. Garcia OP, Long KZ, Rosado JL. Impact of micronutrient deficiencies on obesity.  
744 *Nutr Rev* 2009;67(10):559-72.
- 745 64. Gardner CD, Kim S, Bersamin A, et al. Micronutrient quality of weight-loss diets that  
746 focus on macronutrients: results from the A TO Z study. *Am J Clin Nutr* 2010;92(2):304-12.
- 747 65. Beluska-Turkan K, Korczak R, Hartell B, et al. Nutritional gaps and supplementation  
748 in the first 1000 days. *Nutrients* 2019;11(12):2891.
- 749 66. Bhutta ZA, Das JK, Rizvi A, et al. Evidence-based interventions for improvement of  
750 maternal and child nutrition: what can be done and at what cost? *Lancet* 2013;382(9890):452-  
751 77.
- 752 67. Minh HV, Long KQ. Landscape analysis on childhood overweight and obesity:  
753 Vietnam. Hanoi University of Public Health: UNICEF 2021.
- 754

755 **Figure legends**

756 **Figure 1: Prevalence of different forms of malnutrition by area of residence and age**  
757 **group among Vietnamese children.** A) Stunting. B) Underweight. C) Wasting/thinness. D)  
758 Overweight and obesity. E) Anaemia. F) Iron deficiency. G) Iron deficiency anaemia. H) Low  
759 serum retinol. I) Low serum zinc. Prevalence was estimated based on sampling weight.  
760 ID, iron deficiency; IDA, iron deficiency anaemia.
